# Supplementary material for: A sensitive biosensor with a DNAzyme for lead(ii) detection based on fluorescence turn-on
Source: Royal Society of Chemistry journal article supplement (doi:10.1039/c5an00677e), 2015-01-01
Supplement: c5an00677e1.pdf [file c5an00677e1.pdf]

## Supplementary Information:

### A sensitive biosensor with a DNAzyme for lead (II) detection based on fluorescence turn-on

Yang Guo, Junting Li, Xiaoqian Zhang, Yanli Tang\*

Key Laboratory of Applied Surface and Colloid Chemistry, Ministry of Education,  
Key Laboratory of Analytical Chemistry for Life Science of Shaanxi Province, School  
of Chemistry and Chemical Engineering, Shaanxi Normal University, Xi'an 710062,  
P. R. China

#### Supplementary Figures

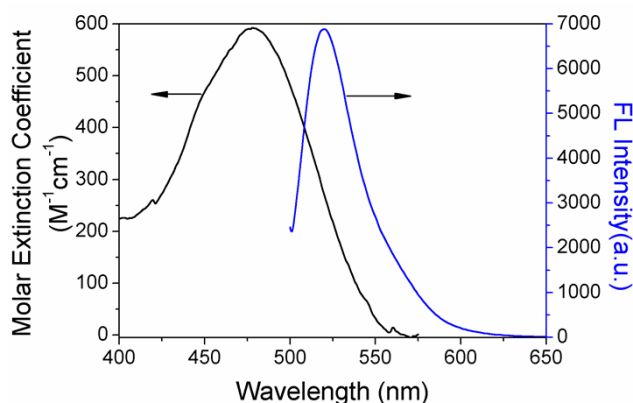

Fig. S1. The fluorescence emission spectrum of 17E-17S-FAM and the absorption spectrum of 17E-17S/EB complexes. 17S, 5'-ACT CAC TAT rAG GAA GAG ATG. The fluorescence emission spectra were excited at 490 nm. The spectral overlap was used to calculate the Förster distance ( $R_0$ ). To simply predict the  $R_0$  and FRET efficiency ( $E$ ), we used the classical equations given in the literature.<sup>1</sup>

$$R_0 = 0.211(\kappa^2 n^{-4} Q_D J(\lambda))^{1/6} \quad (\text{in } \text{Å}) \quad (1)$$

$$E = 1 - \frac{F_{DA}}{F_D} \quad (2)$$

$J(\lambda)$  is the overlap integral between the donor emission and the acceptor absorption. The quantum yield of the donor was taken as 0.95. The  $\kappa^2$  value was assumed to be 2/3. The refractive index ( $n$ ) was taken as 1.4. These assumed values led to an  $R_0$  of 45.6 Å.  $F_{DA}$  and  $F_D$  mean the relative fluorescence intensity of the donor (17E-17S-FAM) in the presence ( $F_{DA}$ ) and absence ( $F_D$ ) of acceptor (EB). According to the measured values ( $F_{DA}$ : 518;  $F_D$ : 6868), the FRET efficiency can be roughly evaluated as 0.91.

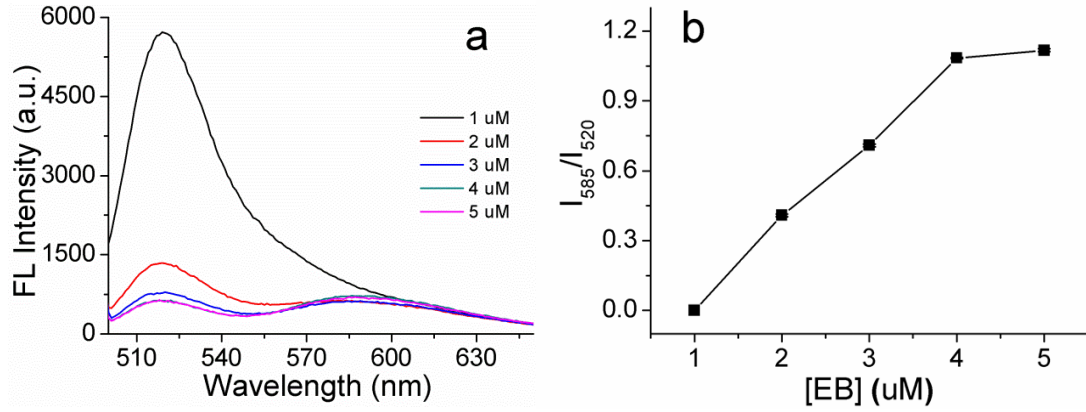

Fig. S2. (a) Fluorescence spectra of 17E/17S-FAM after addition of different concentration of EB. (b) Ratio of fluorescence ( $I_{585}/I_{520}$ ) as a function of EB concentrations.  $[17S-FAM] = 2 \times 10^{-8}$  M,  $[17E] = 2 \times 10^{-8}$  M,  $[EB] = 1\sim 5 \times 10^{-6}$  M. The error bars represent the standard deviations of three parallel measurements. The excitation wavelength is 490 nm.

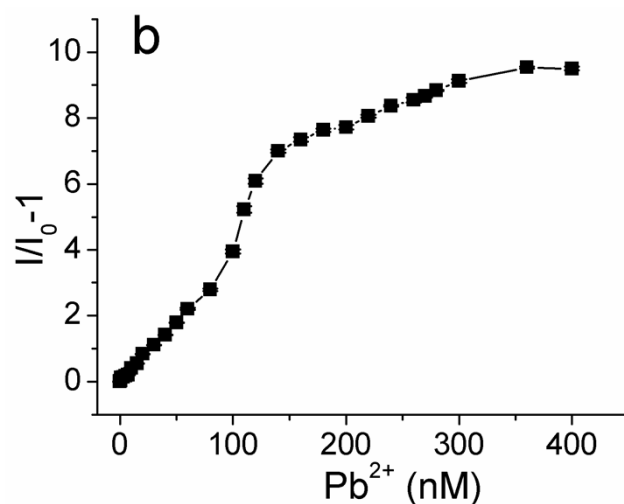

Fig. S3. Increased ratio of FAM fluorescence intensity at 520 nm as a function of  $\text{Pb}^{2+}$  concentration.  $[\text{17S-FAM}] = 2 \times 10^{-8} \text{ M}$ ,  $[\text{17E}] = 2 \times 10^{-8} \text{ M}$ ,  $[\text{EB}] = 4 \times 10^{-6} \text{ M}$ . The error bars represent the standard deviations of three parallel measurements. The excitation wavelength is 490 nm.

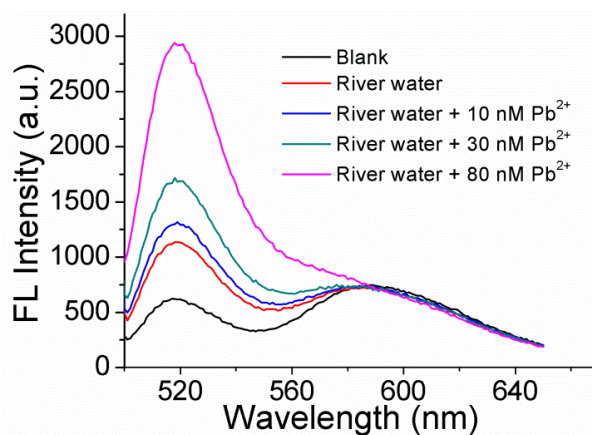

Fig. S4. Application of the biosensor to the analysis of  $\text{Pb}^{2+}$  in river water samples.  $[\text{17S-FAM}] = 2 \times 10^{-8} \text{ M}$ ,  $[\text{17E}] = 2 \times 10^{-8} \text{ M}$ ,  $[\text{EB}] = 4 \times 10^{-6} \text{ M}$ . The excitation wavelength is 490 nm.

Table S1. Recovery Experiments of Pb<sup>2+</sup> in River Water Samples

| River water | Pb <sup>2+</sup> spiked (nM) | Pb <sup>2+</sup> recovered (nM)       | Recovery (%) |
|-------------|------------------------------|---------------------------------------|--------------|
| 1           | 10.0                         | 10.7 <sup>a</sup> ± 1.3% <sup>b</sup> | 107.0        |
| 2           | 30.0                         | 30.3 <sup>a</sup> ± 3.8% <sup>b</sup> | 101.1        |
| 3           | 80.0                         | 82.4 <sup>a</sup> ± 1.7% <sup>b</sup> | 103.1        |

<sup>a</sup> Mean values of three determinations. <sup>b</sup> Relative standard derivation.

**Reference:**

- 1 J. R. Lakowicz, *Principles of Fluorescence Spectroscopy*, 3rd ed., Kluwer academic/ Plenum Publishers: New York, 2006.
